# Supplementary material for: Evaluating Capabilities of Large Language Models: Performance of GPT4 on Surgical Knowledge Assessments
Source: PubMed Central journal article supplement — medRxiv. 2023 Jul 24:2023.07.16.23292743. Preprint. [Version 2] doi: 10.1101/2023.07.16.23292743 (PMC10371188; doi:10.1101/2023.07.16.23292743), 2023-07-24
Supplement: NIHPP2023.07.16.23292743v2-supplement-1.pdf [file NIHPP2023.07.16.23292743v2-supplement-1.pdf]

## Supplemental Material

Supplemental Table 1: Interrater Agreement – Cohen kappa for OE and MC questions

|        | Open-Ended Questions |    | Multiple Choice – Single Answer |    |
|--------|----------------------|----|---------------------------------|----|
|        | Cohen K              | N  | Cohen K                         | N  |
| SCORE  | 0.720                | 30 | 1.0                             | 30 |
| Data-B | 0.681                | 20 | 1.0                             | 20 |

SCORE: Surgical Council on Resident Education

Data-B: refers to a second commonly used surgical knowledge assessment and question bank

### Additional Supplemental Material

All input to the ChatGPT interface and associated output were recorded. Due to copyright laws, this data is not presented in the current manuscript. However, pending requisite approval from the respective organizations, this data may be shared upon reasonable request.
